# Supplementary material for: Insights into the genetic diversity of Mycobacterium tuberculosis in Tanzania
Source: PubMed Central journal article supplement (PMC6461268; doi:10.1371/journal.pone.0206334), 2019-04-12

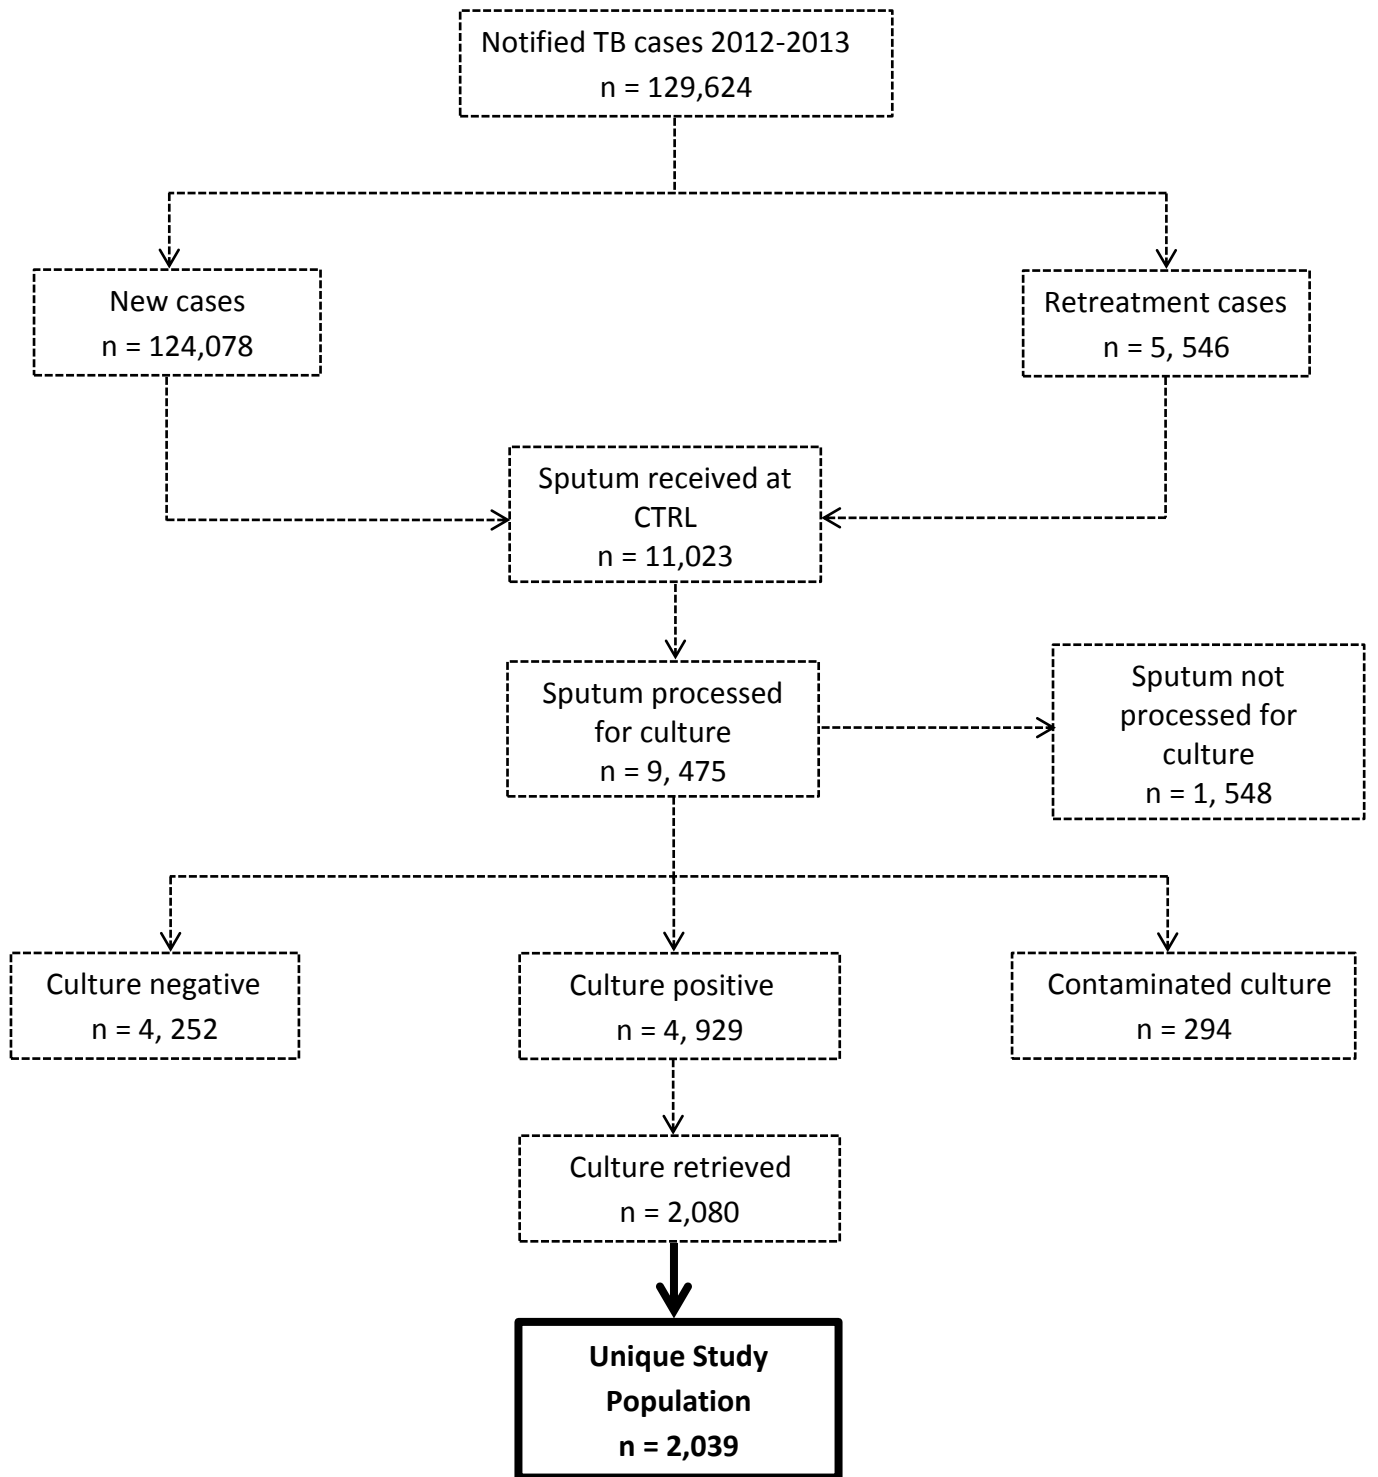

Supplement: pone.0206334.s001.pdf [file pone.0206334.s001.pdf]
