# Supplementary material for: Insights into the genetic diversity of Mycobacterium tuberculosis in Tanzania
Source: PubMed Central journal article supplement (PMC6461268; doi:10.1371/journal.pone.0206334), 2019-04-12
Supplement: pone.0206334.s006.pdf [file pone.0206334.s006.pdf]

**Table S1. Sex distribution across the age groups.**

| Age group             | Sex               |                     | Total        |
|-----------------------|-------------------|---------------------|--------------|
|                       | F                 | M                   |              |
| Child age (< 15)      | 82 (42.5)         | 111 (57.5)          | 193          |
| Young age (15 - 24)   | 208 (35.9)        | 372 (64.1)          | 580          |
| Early adult (25 - 44) | 290 (30.9)        | 647 (69.1)          | 937          |
| Late adult (45 – 64)  | 46 (23.5)         | 150 (76.5)          | 196          |
| Old age (> 65)        | 13 (27.1)         | 35 (72.9)           | 48           |
| <b>Total</b>          | <b>639 (32.7)</b> | <b>1,315 (67.3)</b> | <b>1,954</b> |
