# Supplementary material for: Insights into the genetic diversity of Mycobacterium tuberculosis in Tanzania
Source: PubMed Central journal article supplement (PMC6461268; doi:10.1371/journal.pone.0206334), 2019-04-12
Supplement: pone.0206334.s009.pdf [file pone.0206334.s009.pdf]

Table S3. Mutations detected on the *rpoB* gene

| <b>patient</b> | <b>Lineage</b> | <b>rpoB mutation</b> | <b>Amino acid change</b> |
|----------------|----------------|----------------------|--------------------------|
| 315            | L2             | A1198G;C1349T        | T400A;S450L              |
| 446            | L3             | C1386T               | No change                |
| 470            | L4             | G1683A               | No change                |
| 620            | L4             | A1334T               | H445L                    |
| 626            | L4             | G1333C               | H445D                    |
| 718            | L2             | C1333T               | H445Y                    |
| 719            | L4             | G1683A               | No change                |
| 720            | L2             | C1349T               | S450L                    |
| 1649           | L3             | T1289C               | L430P                    |
| 1816           | L2             | C1349T               | S450L                    |
| 1822           | L3             | C1333T               | H445Y                    |
| 1834           | L2             | C1349T               | S450L                    |
| 1843           | L3             | C1349T               | S450L                    |
| 1927           | L4             | C1294G;A1442G;G1683A | Q432E;E481A; No change   |
| 1949           | L4             | C1333T               | H445Y                    |
