# Supplementary material for: Insights into the genetic diversity of Mycobacterium tuberculosis in Tanzania
Source: PLoS One. 2019 Apr 12;14(4):e0206334. doi: 10.1371/journal.pone.0206334 (PMC6461268; doi:10.1371/journal.pone.0206334)
Supplement: S2 Table — (PDF) [file pone.0206334.s007.pdf]

**Table S2. Spoligotype patterns for selected *M. tuberculosis* clinical isolates.**

[illegible]
